# Supplementary material
Source: MDPI journal article supplement (https://www.mdpi.com/2571-6255/7/2/51)
Supplement: s1 [file s1]

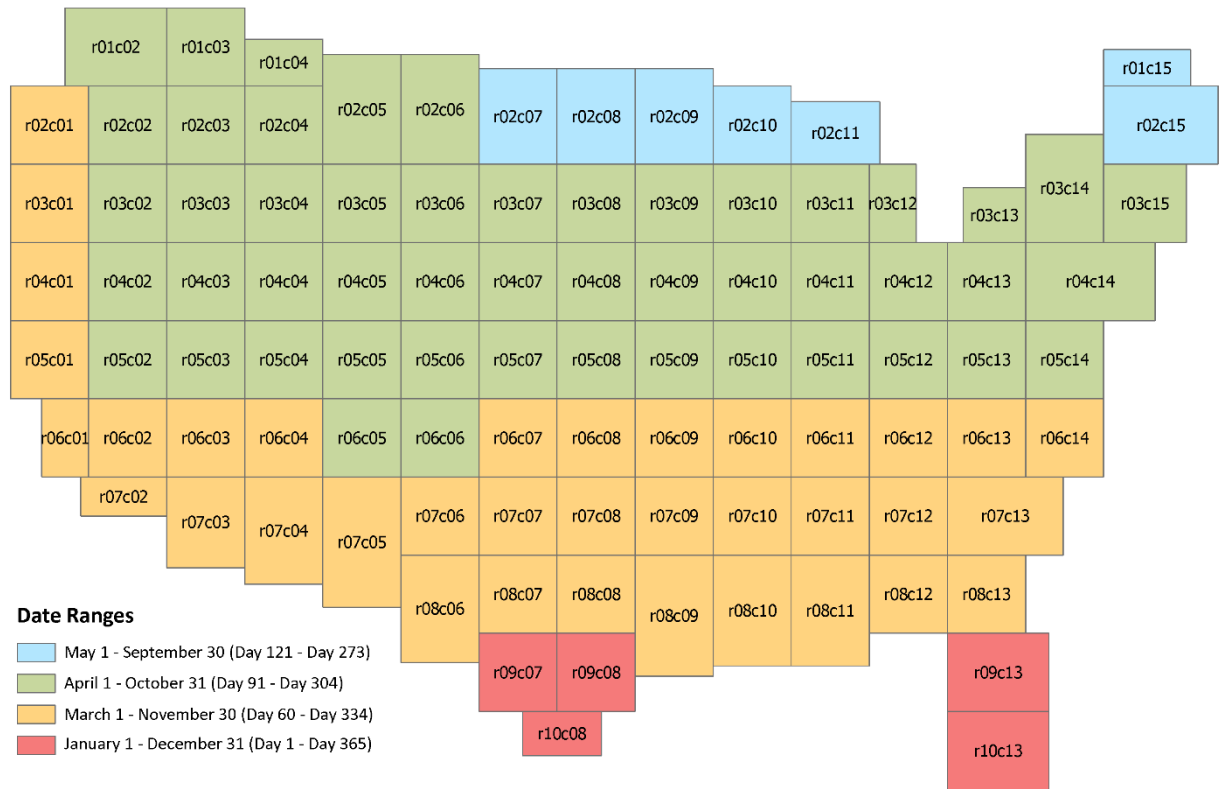

**Figure S1.** Spatially explicit Landscape Fire and Resource Management Planning (LANDFIRE) tile specific growing season date ranges (see Section 2.2.1).

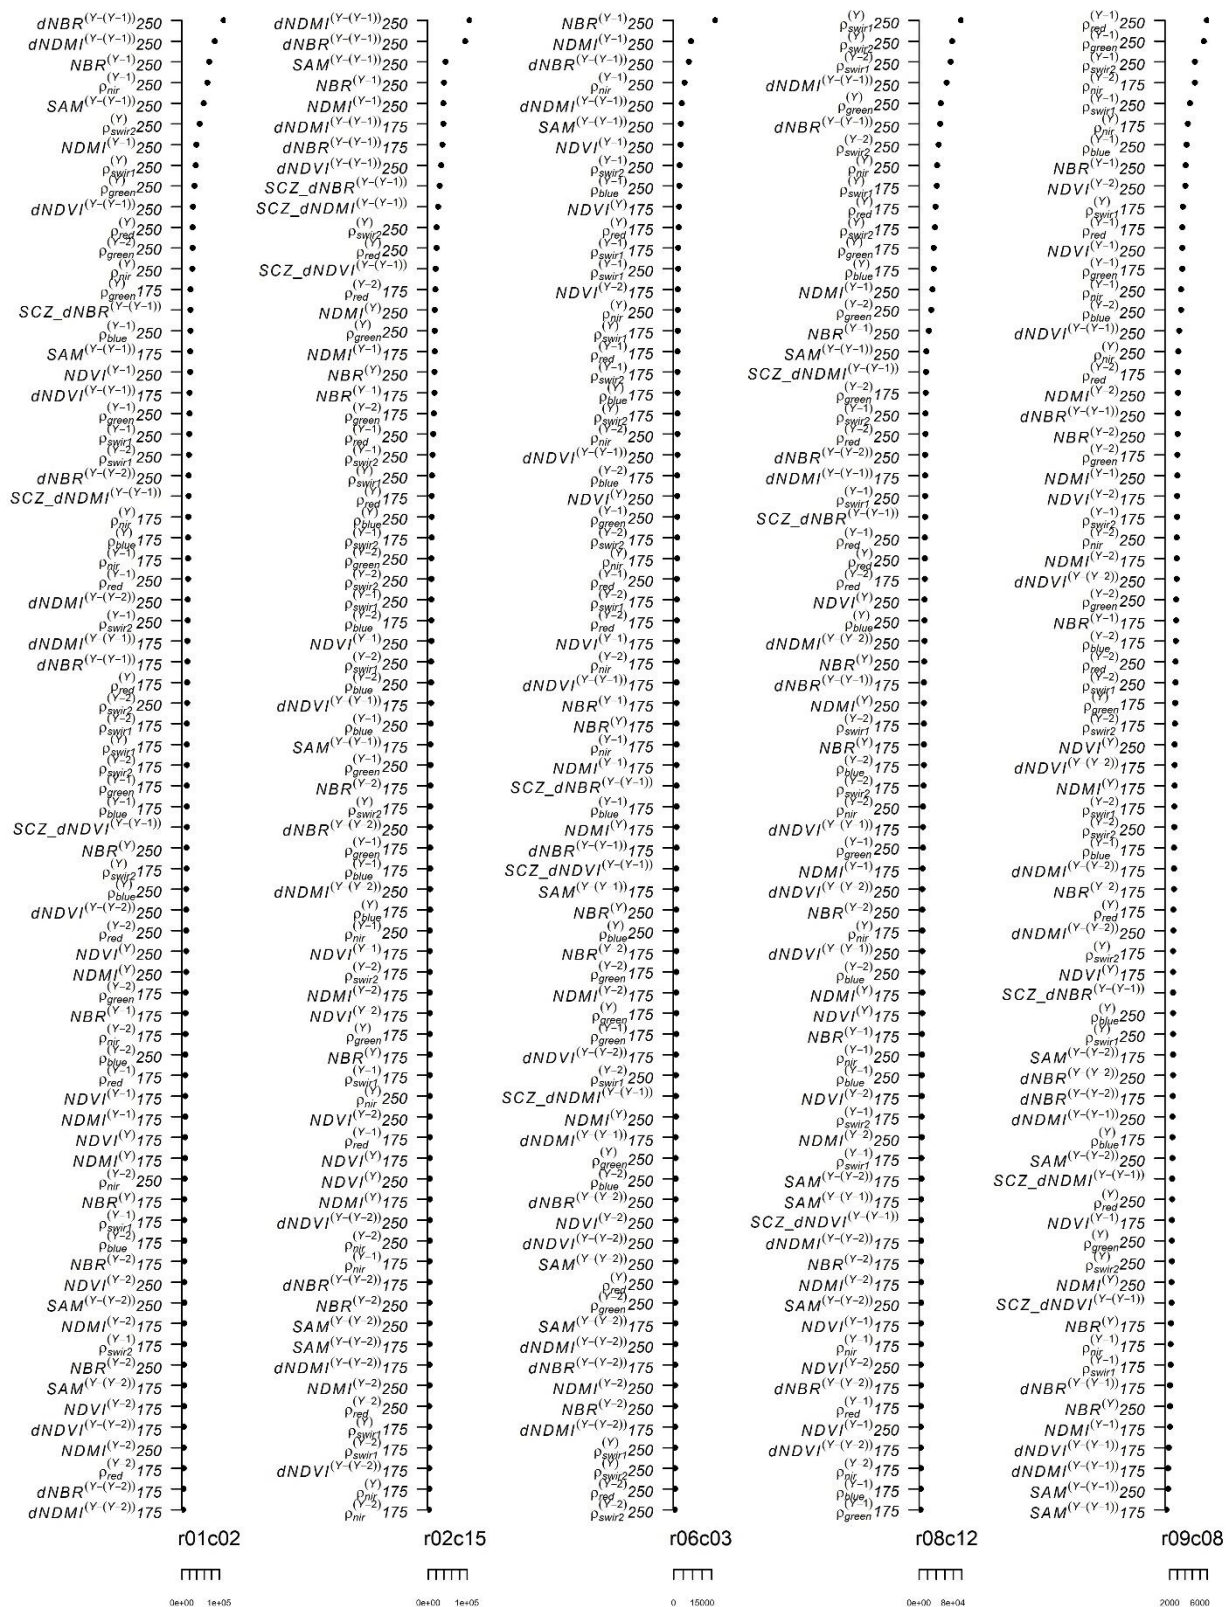

**Figure S2.** Variable importance of all 73 predictor variables inferred using Gini Impurity for the random forest model for each of the five prototyping tiles. Please refer to section 3.11 of the manuscript for variable name and their formulation.

**Table S1.** Data sets described in this work (refer to section 2).

| Name                                                           | Resolution/format | Description                                             | Citation/source |
|----------------------------------------------------------------|-------------------|---------------------------------------------------------|-----------------|
| LF Reference Database (LFRDB)                                  | Vector            | Submitted disturbance polygons                          | 12              |
| Monitoring Trends in Burn Severity (MTBS)                      | 30m               | Monitoring Trends in Burn Severity                      | 36              |
| Burned Area Emergency Response (BAER)                          | 30m               | Burned Area Emergency Response                          | 40              |
| Rapid Assessment of Vegetation Condition After Wildfire (RAVG) | 30m               | Rapid Assessment of Vegetation Condition After Wildfire | 41              |
| USA National Phenology Network (USA NPN)                       | 4km               | USA National Phenology Network                          | 42              |
| National Land Cover Database (NLCD)                            | 30m               | National Landcover database                             | 43              |
| Dynamic Surface Water Extent (DSWE)                            | 30m               | Dynamic Surface Water Extent                            | 44              |
| U.S. Department of Agriculture Cropland Data Layer USDA CDL    | 30-56m            | Cropland data layer                                     | 47              |

**Table S2.** 2016 Spatially Adaptable Filter for Error Reduction (SAFER) prototype evaluation results after inclusion to the remote sensing of landscape change (RSLC) process.

| Tile   | RSLC interim disturbed |            | RSLC interim undisturbed |            | SAFER disturbed |            | SAFER undisturbed |            |
|--------|------------------------|------------|--------------------------|------------|-----------------|------------|-------------------|------------|
|        | Omission               | Commission | Omission                 | Commission | Omission        | Commission | Omission          | Commission |
| r01c02 | 0                      | 88.85      | 3.81                     | 0          | 12.99           | 21.5       | 0.11              | 0.06       |
| r02c15 | 0                      | 90.89      | 7.53                     | 0          | 9.99            | 55.19      | 0.84              | 0.08       |
| r06c03 | 0                      | 99.06      | 4.5                      | 0          | 80.33           | 20.6       | 0                 | 0.03       |
| r09c08 | 0                      | 96.8       | 7.85                     | 0          | 85.53           | 35.08      | 0.02              | 0.22       |
| r08c12 | 0                      | 69.82      | 3.47                     | 0          | 6.5             | 27.91      | 0.54              | 0.1        |

**Table S3.** 2017 Remote Sensing of Landscape Change (SAFER) evaluation results.

| LF tiles | kappa   |       | Overall accuracy [%] |       | SAFER accuracies [%] |            |             |            | Relative effort saved |
|----------|---------|-------|----------------------|-------|----------------------|------------|-------------|------------|-----------------------|
|          | interim | SAFER | Interim              | SAFER | disturbed            |            | undisturbed |            |                       |
|          |         |       |                      |       | Omission             | Commission | Omission    | Commission |                       |
| r10c13   | 0.26    | 0.19  | 93.13                | 98.77 | 89.13                | 16.16      | 0.03        | 1.2        | 82.09                 |
| r10c08   | 0.07    | 0.32  | 85.61                | 98.84 | 57.3                 | 73.93      | 0.8         | 0.38       | 91.91                 |
| r01c15   | 0.35    | 0.87  | 95.44                | 99.66 | 12.29                | 13.32      | 0.18        | 0.17       | 92.51                 |
| r01c02   | 0.38    | 0.86  | 97.56                | 99.79 | 17.73                | 9.73       | 0.07        | 0.14       | 91.54                 |
| r01c03   | 0.35    | 0.81  | 98.36                | 99.82 | 16.49                | 21.72      | 0.11        | 0.07       | 89.06                 |
| r01c04   | 0.26    | 0.8   | 97.13                | 99.82 | 28.9                 | 8          | 0.03        | 0.15       | 93.62                 |
| r02c01   | 0.44    | 0.89  | 97.17                | 99.72 | 5.66                 | 16.32      | 0.22        | 0.07       | 90                    |
| r02c10   | 0.08    | 0.69  | 89.08                | 99.64 | 29.73                | 32.66      | 0.19        | 0.17       | 96.68                 |
| r02c11   | 0.13    | 0.51  | 87.04                | 98.98 | 50.02                | 46.22      | 0.48        | 0.55       | 92.14                 |
| r02c15   | 0.19    | 0.7   | 91.98                | 99.34 | 22.52                | 35.24      | 0.43        | 0.23       | 91.78                 |
| r02c02   | 0.42    | 0.9   | 98.34                | 99.88 | 9.81                 | 10.49      | 0.06        | 0.06       | 92.52                 |
| r02c03   | 0.5     | 0.91  | 98.49                | 99.87 | 13.01                | 3.8        | 0.03        | 0.1        | 91.52                 |
| r02c04   | 0.37    | 0.88  | 95.71                | 99.72 | 19.63                | 1.24       | 0.01        | 0.27       | 93.53                 |
| r02c05   | 0.07    | 0.72  | 91.64                | 99.85 | 43.88                | 0.56       | 0           | 0.14       | 98.26                 |
| r02c06   | 0.02    | 0.44  | 92.3                 | 99.95 | 71.5                 | 3.83       | 0           | 0.05       | 99.31                 |
| r02c07   | 0.02    | 0.26  | 95.56                | 99.95 | 84.4                 | 15.36      | 0           | 0.04       | 98.97                 |
| r02c08   | 0.02    | 0.01  | 96.13                | 99.97 | 99.65                | 38         | 0           | 0.03       | 99.16                 |
| r02c09   | 0.06    | 0.38  | 87.3                 | 98.75 | 19.09                | 74.73      | 1.16        | 0.09       | 90.16                 |
| r03c01   | 0.62    | 0.92  | 97.13                | 99.64 | 11.67                | 3.29       | 0.08        | 0.29       | 87.54                 |
| r03c10   | 0.13    | 0.26  | 88.39                | 98.79 | 78.3                 | 64.67      | 0.41        | 0.81       | 89.61                 |
| r03c11   | 0.14    | 0.46  | 90.81                | 99.04 | 49.44                | 56.19      | 0.55        | 0.42       | 89.51                 |
| r03c12   | 0.12    | 0.6   | 97.38                | 99.8  | 16.98                | 52.56      | 0.17        | 0.03       | 92.28                 |
| r03c13   | 0.02    | 0.05  | 91.81                | 99.91 | 97.31                | 35.32      | 0           | 0.09       | 98.86                 |
| r03c14   | 0.05    | 0.63  | 89.91                | 99.82 | 44.43                | 27.39      | 0.06        | 0.12       | 98.23                 |
| r03c15   | 0.23    | 0.17  | 86.4                 | 97.76 | 90.06                | 16.09      | 0.05        | 2.2        | 83.5                  |
| r03c02   | 0.54    | 0.52  | 98.19                | 99.29 | 64.22                | 2.85       | 0.01        | 0.7        | 60.78                 |
| r03c03   | 0.29    | 0.53  | 98.03                | 99.72 | 62.17                | 12.82      | 0.02        | 0.26       | 85.86                 |
| r03c04   | 0.08    | 0.3   | 97.68                | 99.89 | 78.25                | 51.84      | 0.02        | 0.08       | 95.41                 |
| r03c05   | 0.05    | 0.16  | 96.24                | 99.86 | 88.23                | 76.73      | 0.04        | 0.09       | 96.38                 |
| r03c06   | 0.11    | 0.55  | 88.47                | 99.15 | 34.63                | 52.65      | 0.58        | 0.28       | 92.63                 |
| r03c07   | 0.01    | 0.16  | 95.12                | 99.97 | 90.18                | 48.93      | 0           | 0.03       | 99.41                 |
| r03c08   | 0.01    | 0.11  | 91.19                | 99.9  | 80.35                | 92.77      | 0.07        | 0.02       | 98.91                 |
| r03c09   | 0.03    | 0.29  | 92.96                | 99.91 | 81.65                | 30.99      | 0.01        | 0.08       | 98.7                  |
| r04c01   | 0.17    | 0.79  | 96.12                | 99.83 | 26.23                | 15.82      | 0.06        | 0.11       | 95.66                 |
| r04c10   | 0.21    | 0.06  | 86.58                | 96.72 | 93.74                | 90.3       | 1.28        | 2.05       | 75.59                 |
| r04c11   | 0.28    | 0.29  | 95.25                | 98.07 | 56.26                | 76.8       | 1.4         | 0.55       | 59.46                 |
| r04c12   | 0.02    | 0.14  | 94.29                | 99.32 | 12.43                | 92.4       | 0.67        | 0.01       | 88.12                 |
| r04c13   | 0.06    | 0.48  | 88.5                 | 99.71 | 65.46                | 20.35      | 0.03        | 0.25       | 97.51                 |
| r04c14   | 0.05    | 0.43  | 89.66                | 99.78 | 69.55                | 24.09      | 0.03        | 0.19       | 97.87                 |
| r04c02   | 0.4     | 0.94  | 97.97                | 99.92 | 9.13                 | 2.85       | 0.02        | 0.06       | 95.99                 |
| r04c03   | 0.38    | 0.8   | 96.92                | 99.68 | 32.54                | 0.51       | 0           | 0.32       | 89.55                 |
| r04c04   | 0.07    | 0.69  | 95.91                | 99.92 | 39.82                | 19.37      | 0.02        | 0.06       | 98.01                 |

|        |      |      |       |       |       |       |      |      |       |
|--------|------|------|-------|-------|-------|-------|------|------|-------|
| r04c05 | 0.05 | 0.31 | 95.29 | 99.61 | 37.89 | 79.17 | 0.34 | 0.05 | 91.71 |
| r04c06 | 0.03 | 0.48 | 96.28 | 99.94 | 48.11 | 56.1  | 0.04 | 0.03 | 98.28 |
| r04c07 | 0.01 | 0.25 | 93.1  | 99.93 | 73.09 | 76.75 | 0.04 | 0.03 | 98.98 |
| r04c08 | 0.02 | 0.06 | 91.64 | 98.94 | 49.34 | 96.65 | 1.03 | 0.04 | 87.3  |
| r04c09 | 0.01 | 0.01 | 86.13 | 92.75 | 18.85 | 99.46 | 7.24 | 0.01 | 47.75 |
| r05c01 | 0.19 | 0.86 | 94.53 | 99.83 | 22.6  | 2.79  | 0.02 | 0.16 | 96.86 |
| r05c10 | 0.01 | 0.03 | 94.57 | 97.82 | 9.01  | 98.51 | 2.18 | 0    | 59.79 |
| r05c11 | 0.06 | 0.47 | 96.86 | 99.91 | 61.06 | 40.15 | 0.03 | 0.06 | 97.27 |
| r05c12 | 0.11 | 0.62 | 97.05 | 99.87 | 47.59 | 24.79 | 0.03 | 0.09 | 95.67 |
| r05c13 | 0.14 | 0.73 | 94.51 | 99.78 | 35.85 | 15.77 | 0.06 | 0.17 | 95.93 |
| r05c14 | 0.42 | 0.35 | 97.64 | 99.29 | 77.83 | 9.95  | 0.02 | 0.69 | 69.77 |
| r05c02 | 0.27 | 0.62 | 97.98 | 99.79 | 54.26 | 1.66  | 0    | 0.21 | 89.37 |
| r05c03 | 0.04 | 0.44 | 96.77 | 99.95 | 69.56 | 18.07 | 0    | 0.04 | 98.54 |
| r05c04 | 0.13 | 0.72 | 95.05 | 99.83 | 43.35 | 2.15  | 0    | 0.17 | 96.49 |
| r05c05 | 0.03 | 0.21 | 91.54 | 99.84 | 87.25 | 42.41 | 0.02 | 0.14 | 98.11 |
| r05c06 | 0.04 | 0.38 | 94.88 | 99.81 | 46.7  | 70.2  | 0.14 | 0.05 | 96.3  |
| r05c07 | 0    | 0.02 | 96.12 | 99.98 | 95.73 | 98.29 | 0.01 | 0.01 | 99.47 |
| r05c08 | 0.08 | 0.43 | 96.01 | 99.82 | 60.18 | 52.64 | 0.08 | 0.1  | 95.44 |
| r05c09 | 0.01 | 0.02 | 92.86 | 96.8  | 9.94  | 98.78 | 3.2  | 0    | 55.13 |
| r06c01 | 0.42 | 0.93 | 97.81 | 99.9  | 11.49 | 0.82  | 0.01 | 0.09 | 95.52 |
| r06c10 | 0.04 | 0.32 | 91.34 | 99.5  | 40.77 | 77.45 | 0.42 | 0.08 | 94.22 |
| r06c11 | 0.06 | 0.47 | 92.28 | 99.54 | 15.79 | 66.94 | 0.42 | 0.04 | 94.04 |
| r06c12 | 0.06 | 0.49 | 88.57 | 99.4  | 34.42 | 60.06 | 0.44 | 0.16 | 94.79 |
| r06c13 | 0.26 | 0.8  | 94.52 | 99.57 | 17.11 | 23.13 | 0.26 | 0.18 | 92.17 |
| r06c14 | 0.65 | 0.84 | 97.96 | 99.42 | 18.75 | 11.57 | 0.21 | 0.38 | 71.59 |
| r06c02 | 0.13 | 0.77 | 97.29 | 99.92 | 31.82 | 12.44 | 0.02 | 0.07 | 96.87 |
| r06c03 | 0.11 | 0.71 | 97.59 | 99.93 | 45.15 | 1.16  | 0    | 0.07 | 97.19 |
| r06c04 | 0.08 | 0.58 | 95.74 | 99.88 | 55.89 | 16.74 | 0.02 | 0.1  | 97.24 |
| r06c05 | 0.11 | 0.2  | 87.36 | 98.37 | 75.73 | 81.26 | 0.96 | 0.69 | 87.09 |
| r06c06 | 0.06 | 0.37 | 94.43 | 99.81 | 67.43 | 56.42 | 0.07 | 0.12 | 96.56 |
| r06c07 | 0.34 | 0.8  | 95.49 | 99.52 | 20.25 | 19.75 | 0.24 | 0.25 | 89.3  |
| r06c08 | 0.17 | 0.3  | 93.27 | 98.41 | 53.69 | 77.12 | 1.19 | 0.41 | 76.31 |
| r06c09 | 0.06 | 0.47 | 93.92 | 99.65 | 28.44 | 65.28 | 0.29 | 0.06 | 94.32 |
| r07c10 | 0.42 | 0.77 | 97.23 | 99.47 | 14.34 | 30.23 | 0.39 | 0.15 | 80.91 |
| r07c11 | 0.18 | 0.81 | 89.14 | 99.51 | 23.18 | 14.01 | 0.17 | 0.32 | 95.53 |
| r07c12 | 0.33 | 0.82 | 94.12 | 99.44 | 19.72 | 16.33 | 0.25 | 0.31 | 90.54 |
| r07c13 | 0.46 | 0.83 | 95.68 | 99.24 | 6.14  | 25.71 | 0.65 | 0.12 | 82.43 |
| r07c02 | 0.11 | 0.62 | 98.61 | 99.95 | 52.86 | 8.72  | 0    | 0.05 | 96.42 |
| r07c03 | 0.07 | 0.33 | 99.08 | 99.97 | 79.11 | 16.43 | 0    | 0.03 | 96.64 |
| r07c04 | 0.23 | 0.69 | 94.64 | 99.6  | 45.16 | 5.77  | 0.03 | 0.38 | 92.44 |
| r07c05 | 0.04 | 0.26 | 83.1  | 98.93 | 51.99 | 81.39 | 0.86 | 0.21 | 93.68 |
| r07c06 | 0.04 | 0.31 | 94.74 | 99.69 | 35.11 | 79.44 | 0.27 | 0.04 | 94.13 |
| r07c07 | 0.06 | 0.23 | 90.01 | 98.48 | 29.43 | 85.69 | 1.43 | 0.1  | 84.77 |
| r07c08 | 0.04 | 0.3  | 88.39 | 99.22 | 34    | 80.04 | 0.69 | 0.09 | 93.29 |
| r07c09 | 0.34 | 0.79 | 94.66 | 99.36 | 16.7  | 24.87 | 0.41 | 0.25 | 87.94 |
| r08c10 | 0.49 | 0.85 | 97.63 | 99.67 | 17.68 | 11.05 | 0.12 | 0.21 | 86.18 |
| r08c11 | 0.41 | 0.84 | 94.5  | 99.35 | 12.72 | 17.68 | 0.39 | 0.27 | 88.24 |

|               |             |             |              |              |             |              |            |             |              |
|---------------|-------------|-------------|--------------|--------------|-------------|--------------|------------|-------------|--------------|
| r08c12        | 0.45        | 0.81        | 95.26        | 99.28        | 24.12       | 12.14        | 0.22       | 0.51        | 84.75        |
| r08c13        | 0.51        | 0.76        | 94.45        | 98.62        | 29.66       | 16.17        | 0.45       | 0.97        | 75.15        |
| r08c06        | 0.01        | 0.14        | 68.32        | 97.12        | 25.69       | 91.88        | 2.81       | 0.09        | 90.9         |
| r08c07        | 0.04        | 0.1         | 81.63        | 93.8         | 18          | 94.08        | 6.15       | 0.09        | 66.25        |
| r08c08        | 0.05        | 0.1         | 85.32        | 93.93        | 11.58       | 94.14        | 6.05       | 0.05        | 58.65        |
| r08c09        | 0.33        | 0.66        | 92.94        | 98.67        | 30.49       | 36.45        | 0.77       | 0.59        | 81.2         |
| r09c13        | 0.26        | 0.41        | 93.4         | 98.99        | 72.02       | 22.13        | 0.1        | 0.92        | 84.65        |
| r09c07        | 0.01        | 0.07        | 67.28        | 95.16        | 22.58       | 96.14        | 4.79       | 0.06        | 85.22        |
| r09c08        | 0.06        | 0.3         | 87.24        | 98.66        | 32.99       | 80.33        | 1.2        | 0.15        | 89.52        |
| <b>median</b> | <b>0.11</b> | <b>0.47</b> | <b>94.55</b> | <b>99.66</b> | <b>5.66</b> | <b>28.81</b> | <b>0.1</b> | <b>0.12</b> | <b>92.48</b> |
